# Supplementary material
Source: publisher figshare collection journal article supplement (https://karger.figshare.com/articles/dataset/_/5241259)
Supplement: Supplementary file 1 [file 1 › 000322971_sm_Erratum.pdf]

## Erratum

---

In the article by Tisdale et al. 'Skeletal Muscle Metabolic Gene Expression Is Not Affected by Dichloroacetate-Mediated Modulation of Substrate Utilisation' (Ann Nutr Metab 2011;58:19–24) the correct author order is:

Paul B. Tisdale<sup>a</sup> Nandini Seevaratnam<sup>a</sup> Ian A. Macdonald<sup>a</sup> Kostas Tsintzas<sup>a</sup>  
Andrew J. Bennett<sup>a, b</sup>

<sup>a</sup>School of Biomedical Sciences and <sup>b</sup>FRAME Lab, Queens Medical Centre,  
University of Nottingham, Nottingham, UK
