# Supplementary material
Source: publisher figshare collection journal article supplement (https://karger.figshare.com/articles/dataset/_/5241259)
Supplement: Supplementary file 1 [file 1 › 000322971_sm_Table.pdf]

Supplementary Table 1. Oligonucleotide sequences for primer/probe pairs used in qRT-PCR

| Gene          | Accession number | Forward Primer               | Probe                               | Reverse Primer          |
|---------------|------------------|------------------------------|-------------------------------------|-------------------------|
| PDK4          | NM_002612        | caaggatgctctgtgatcagtattattt | catctccagaattaaagcttacacaagtgaatgga | tgtgaattggttggtctggaaa  |
| PDK2          | NM_002611        | catcatgaaagagatcaacctgctt    | ccgaccgagtgctgagcacaccc             | caggaggctctggacatacca   |
| HKII          | NM_000189        | aagttctgtctcagattgagagtgact  | ctgcaacacttagggcttgagagcacctg       | cagtgcacacctcctaacaatg  |
| CPT1          | NM_001876        | tttggccctgtagcagatgat        | Tcgtgttctcgctgcaatcatgt             | acttgctggagatgtggaagaag |
| UCP3          | NM_003356        | ctggactaccacctgctcact        | aggatcccaaacgcaaaaaggagg            | aggttacgaacatcaccacgt   |
| SREBP1c       | NM_004176        | ggaggggtagggccaac            | cgcgagccatggattgcac                 | gtcaaataggccagggaagtc   |
| PPAR $\alpha$ | NM_005036        | gcttcctgctcatagataagagctt    | agctcggcggcacaaccagca               | caccatcgcgaccagatg      |
| PPAR $\delta$ | NM_006238        | tgcggccatcattctgtgt          | accggccaggcctcatgaacg               | caggatggtgtcctggatagc   |
| PGC1 $\alpha$ | NM_013261        | ggtgcagtgaccaatcagaaataa     | atccaatcagtacaacaatgagccttcaaacatat | ttgcctcattcttcatctatctt |

PDK4 pyruvate dehydrogenase kinase, isoenzyme 4; PDK2 pyruvate dehydrogenase kinase, isoenzyme 2; HKII hexokinase, isoenzyme 2; CPT1 carnitinepalmitoyltransferase 1; UCP3 uncoupling protein 3; SREBP1c sterol regulatory element binding transcription factor 1c; PPAR $\alpha$  peroxisome proliferator-activated receptor alpha; PPAR $\delta$  peroxisome proliferator-activated receptor delta; PGC1 $\alpha$  peroxisome proliferator-activated receptor gamma coactivator-1.
